# Supplementary material for: Specific Acquisition of Functional CD59 but Not CD46 or CD55 by Hepatitis C Virus
Source: PLOS journal article supplement (doi:10.1371/journal.pone.0045770), 2012-09-25
Supplement: S1 (10.1371/journal.pone.0045770.s001) [file journal.pone.0045770.s001]

Figure S1: Effect of hCD59 siRNA KD on hCD59 expression

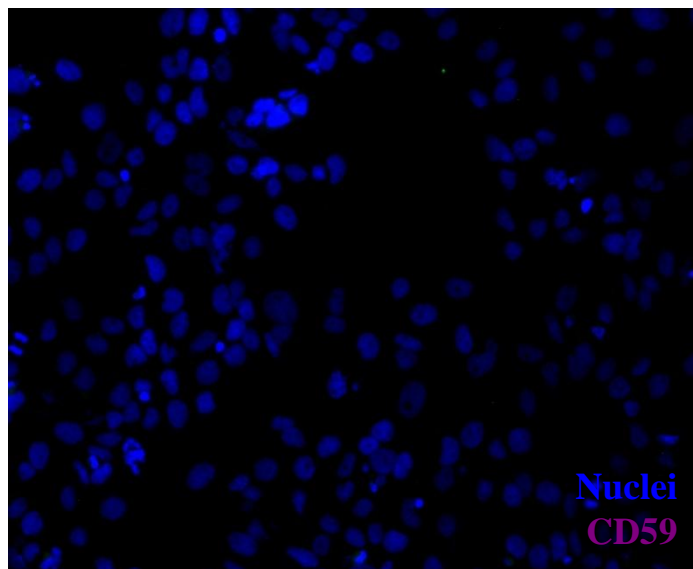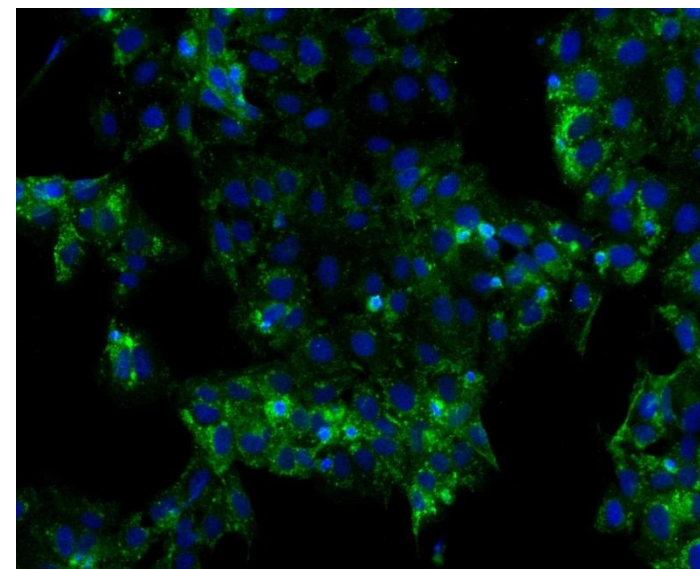

PFA 3%  
+ Saponin 0,5%  
1st Ab 1:200 ON - 4C  
2nd Ab 1:1000 alexa 488  
2,5h - RT

NO 1st Ab

Non targeting

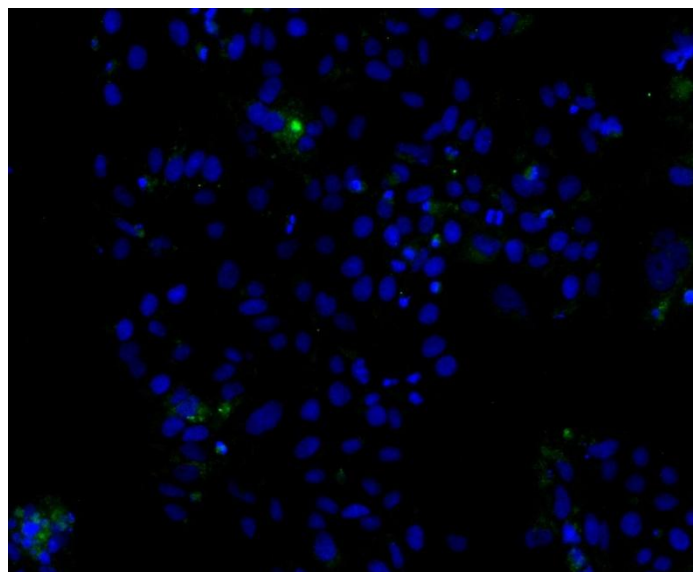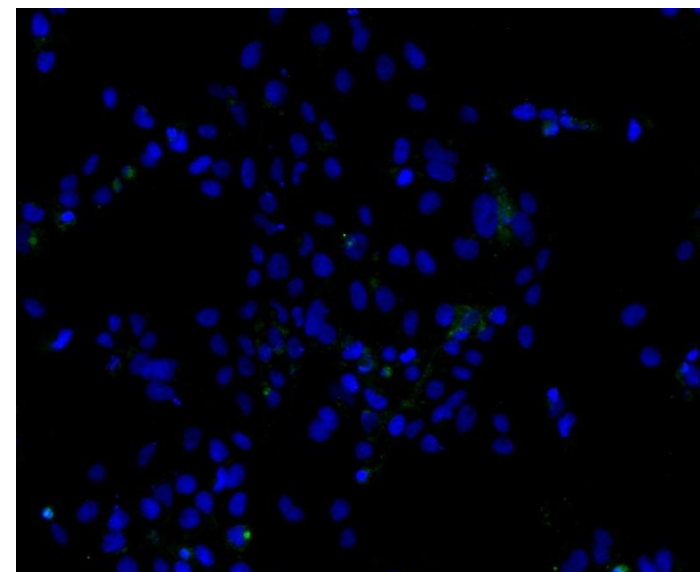

3d KD

siCD59 – 25nM

siCD59 – 50nM
